# See and Hear What the Field Is Discussing!

*Psychiatric Services* features research related to the delivery of mental health services, especially for people with serious mental illness in community-based treatment programs. Provision of high-quality care involves collaboration among a variety of professionals. Clinicians, administrators, and policy makers look to *Psychiatric Services* for research on how to deliver evidence-based treatments, to take an integrated “whole-health” approach to care, and to better engage individuals in their care. Mental health’s current focus on patient-centered, recovery-oriented care and on dissemination of evidence-based practices is transforming service delivery systems at all levels. Research published in *Psychiatric Services* contributes to this transformation.

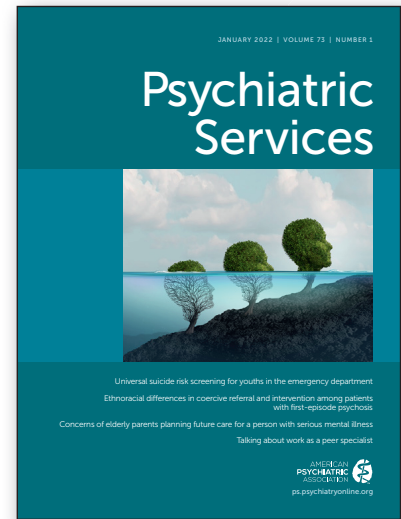

## Our Most Talked About Articles so far in 2022:

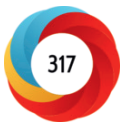

### Mental Health Conservatorship Among Homeless People With Serious Mental Illness

Published online Oct. 27, 2021

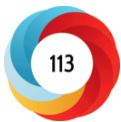

### Addiction Treatment and Telehealth: Review of Efficacy and Provider Insights During the COVID-19 Pandemic

Published online Oct 13, 2021

## The Discussion Continues: Psychiatric Services’ Podcast “From Pages to Practice”

Editor Lisa Dixon, M.D., M.P.H., and Podcast Editor and co-host Josh Berezin, M.D., M.S., discuss the latest mental health services research published in *Psychiatric Services* and why it is relevant. Topics include community-based treatment programs, collaborative care, evidence-based treatment and service delivery, criminal and social justice, policy analysis, and more.

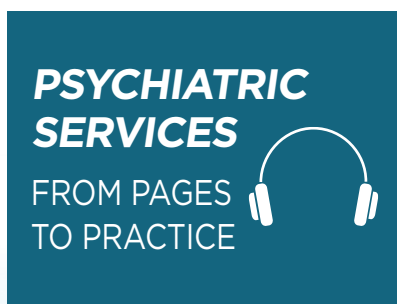

### Cops, Clinicians, or Both? Collaborative Approaches to Responding to Behavioral Health Emergencies

Margaret E. Balfour, M.D., Ph.D., and Sgt. Jason Winsky look at collaborations between police and clinicians in the treatment of mental health and behavioral health emergencies.

### Implementation Potential of Moral Reconciliation Therapy for Criminal Recidivism in Mental Health Residential Programs

Daniel M. Blonigen, Ph.D., discusses implementing moral reconciliation therapy in a noncorrectional setting among justice-involved veterans receiving residential mental health treatment with an aim towards reducing criminal recidivism.
