SUMMER 2022 | VOLUME 20 | NUMBER 3

# Focus

The Journal of Lifelong Learning in Psychiatry

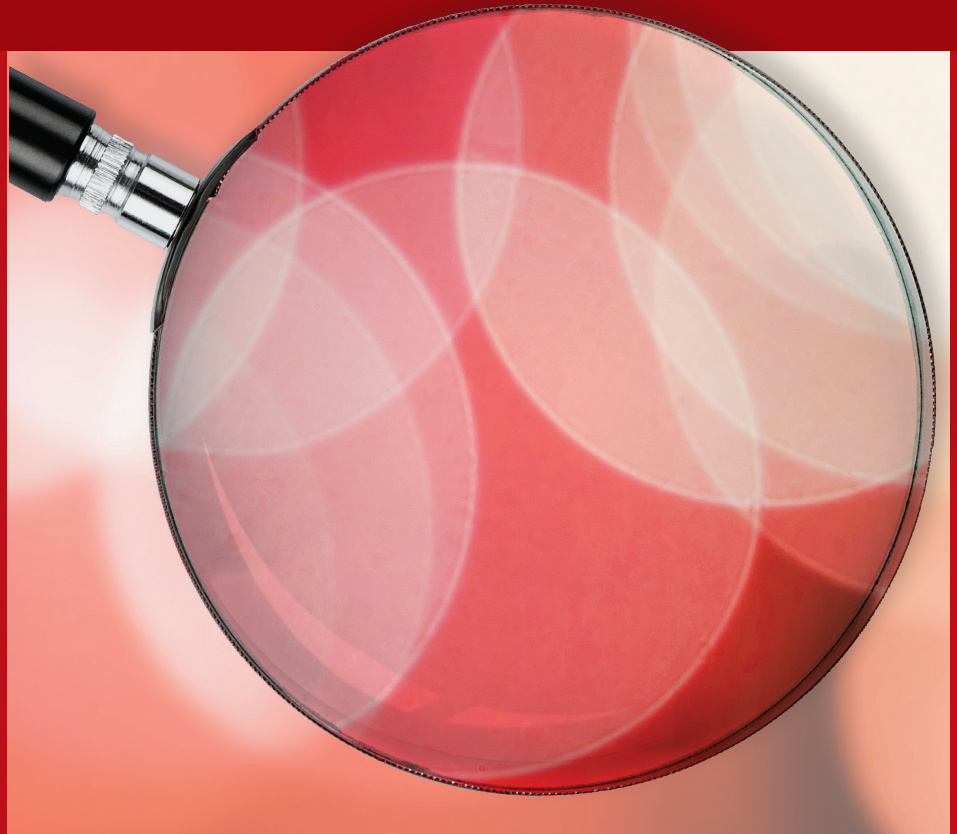

## Innovations in Psychotherapy

Guest Editor: Jordan E. Cattie, Ph.D.

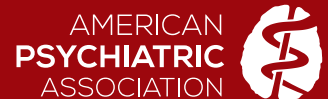

[focus.psychiatryonline.org](http://focus.psychiatryonline.org)
